# Supplementary material
Source: PubMed Central journal article supplement (PMC123653)
Supplement: pnas_022056399_5.pdf [file pnas_022056399_5.pdf]

XPKA $\alpha$  MGNAATTKKGGIEISVKEFLAKAKEDFLKKWESPAQNTANLDQFERMKTGTSFGRVML  
huPKA $\alpha$  MGNAAAAKKGGSEQESVKEFLAKAKEDFLKKWESPAQNTAHLQFERIKTLGTSFGRVML  
XPKA $\beta$  MGNAATAKKGNEIESVKEFLAKAKEDFLRKWETPPQNTASLDDFDRMKTGTSFGRVML  
huPKA $\beta$  MGNAATAKKGSEVESVKEFLAKAKEDFLKKWENPTQNNAGLEDFERKKTGTSFGRVML  
huPKA $\gamma$  MGNAPAKKDTEQEEESVNEFLAKARGDFLYRWGNPAQNTASSDQFERLRTLGMGSFGRVML  
\*\*\*\* \* \*\*\* \*\*\*\*\* \*\* \* \* \* \* \* \* \* \* \* \* \*\*\*\*\*

XPKA $\alpha$  VRHKENGSHFAMKILDKQKVVLKQIEHTLNEKRILQAVNFPFLVRLSEYFKDNTNLYMV  
huPKA $\alpha$  VKHKETGNHYAMKILDKQKVVLKQIEHTLNEKRILQAVNFPFLVKLEFSFKDNSNLYMV  
XPKA $\beta$  VKHKGAEQYYAMKILDKQKVVLKQIEHTLNEKRILQAVNFPFLVRLSEYFKDNSNLYMI  
huPKA $\beta$  VKHKATEQYYAMKILDKQKVVLKQIEHTLNEKRILQAVNFPFLVRLSEYAFKDNSNLYMV  
huPKA $\gamma$  VRHQETGGHYAMKILNKQKVVMKQVEHILNEKRILQAIIDFPFLVKLQFSFKDNSYLYLV  
\* \* \*\*\*\*\* \*\*\*\*\* \* \* \* \* \* \* \* \* \* \* \*\*\*\*\* \* \* \* \* \*

XPKA $\alpha$  MEYVAGGEMFSHLRRIGRFSEPHARFYASQIVLTFEYLHALDLIYRDLKPENLLIDQOQY  
huPKA $\alpha$  MEYVPGGEMFSHLRRIGRFSEPHARFYAAQIVLTFEYLHSLDLIYRDLKPENLLIDQOQY  
XPKA $\beta$  MEYVPGGEMFSHLRRIGRFSEPHARFYAAQIVLTFEYLHSLDLIYRDLKPENLLIDQOQY  
huPKA $\beta$  MEYVPGGEMFSHLRRIGRFSEPHARFYAAQIVLTFEYLHSLDLIYRDLKPENLLIDHGOY  
huPKA $\gamma$  MEYVPGGEMFSRLQRVGRFSEPHACFYAAQVVLAVQYLHSLDLIHRDLKPENLLIDQOQY  
\*\*\*\* \*\*\*\*\* \* \* \*\*\*\*\* \*\* \* \* \* \* \* \* \* \* \* \* \*\*\*\*\* \*\*

XPKA $\alpha$  IQVTDGFAKRVKGRWTWLCGTPEYLAPEIILSKGYNKAVDWWALGVLIIYEMAAGYPPFF  
huPKA $\alpha$  IQVTDGFAKRVKGRWTWLCGTPEYLAPEIILSKGYNKAVDWWALGVLIIYEMAAGYPPFF  
XPKA $\beta$  IQVTDGFAKRVKGRWTWLCGTPEYLAPEIILSKGYNKAVDWWALGVLIIYEMAAGYPPFF  
huPKA $\beta$  IQVTDGFAKRVKGRWTWLCGTPEYLAPEIILSKGYNKAVDWWALGVLIIYEMAAGYPPFF  
huPKA $\gamma$  LQVTDGFAKRVKGRWTWLCGTPEYLAPEIILSKGYNKAVDWWALGVLIIYEMAVGFPPFY  
\*\*\*\*\* \* \* \*

XPKA $\alpha$  ADQPIQIYEKIVSGKVRFPESHFSSDLKDLLRNLLQVDLTKRFGNLKNGVTDIKGHKWFST  
huPKA $\alpha$  ADQPIQIYEKIVSGKVRFPESHFSSDLKDLLRNLLQVDLTKRFGNLKNGVNDIKNHKWFAT  
XPKA $\beta$  ADQPIQIYEKIVSGKVRFPESHFSSDLKDLLRNLLQVDLTKRYGNLKNGVNDIKNHKWFAT  
huPKA $\beta$  ADQPIQIYEKIVSGKVRFPESHFSSDLKDLLRNLLQVDLTKRFGNLKNGVSDIKTHKWFAT  
huPKA $\gamma$  ADQPIQIYEKIVSGRVRFPKSLSSDLKDLLRSLLQVDLTKRFGNLRNGVGDIKNHKWFAT  
\*\*\*\*\* \*\*\*\*\* \*\*\*\*\* \*\*\*\*\* \* \* \* \* \* \* \* \* \* \*

XPKA $\alpha$  TDWIAVYQKKVEAPFIPKCKGPGDTSNFDDYEEEEIRVSITEKCAKEFSDF  
huPKA $\alpha$  TDWIAIYQRKVEAPFIPKFKGPGDTSNFDDYEEEEIRVINEKCGKEFSEF  
XPKA $\beta$  TDWIAIYQRKVEAPFIPKCRGPGDTSNFDDYEG-SFHLSLTEKCAKEFADF  
huPKA $\beta$  TDWIAIYQRKVEAPFIPKFRGSGDTSNFDDYEEEDIRVSITEKCAKEFGEF  
huPKA $\gamma$  TSWIAIYEKKVEAPFIPKYTGPGDASNFDYEEELRISINEKCAKEFSEF  
\* \* \* \* \* \* \* \* \* \* \* \* \* \* \* \* \* \* \* \* \* \* \* \* \* \*
