# Supplementary material
Source: PubMed Central journal article supplement (PMC123653)

**A**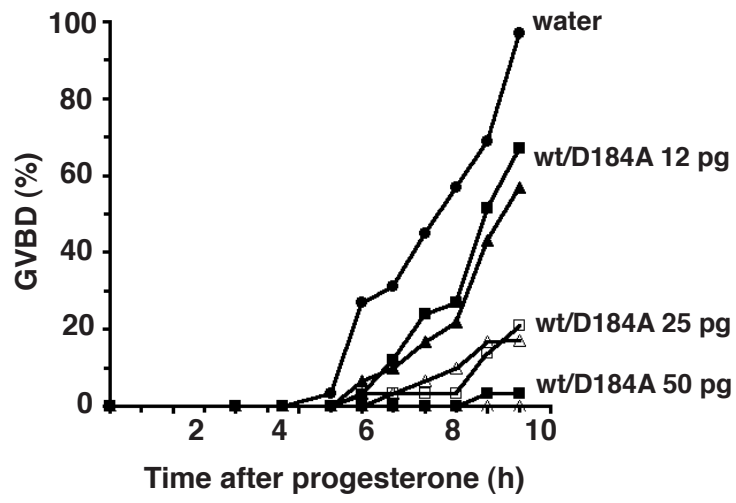**B**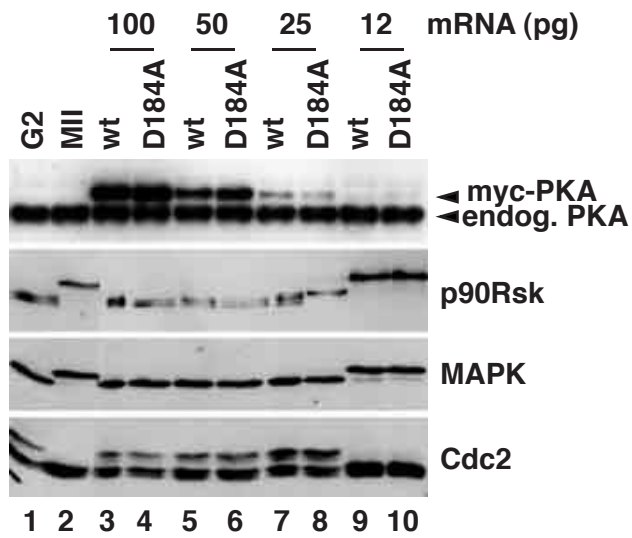**C**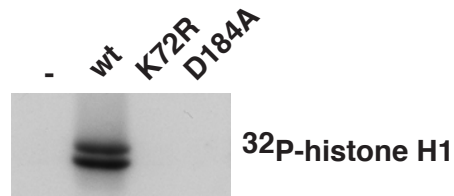

Supplement: pnas_022056399_6.pdf [file pnas_022056399_6.pdf]

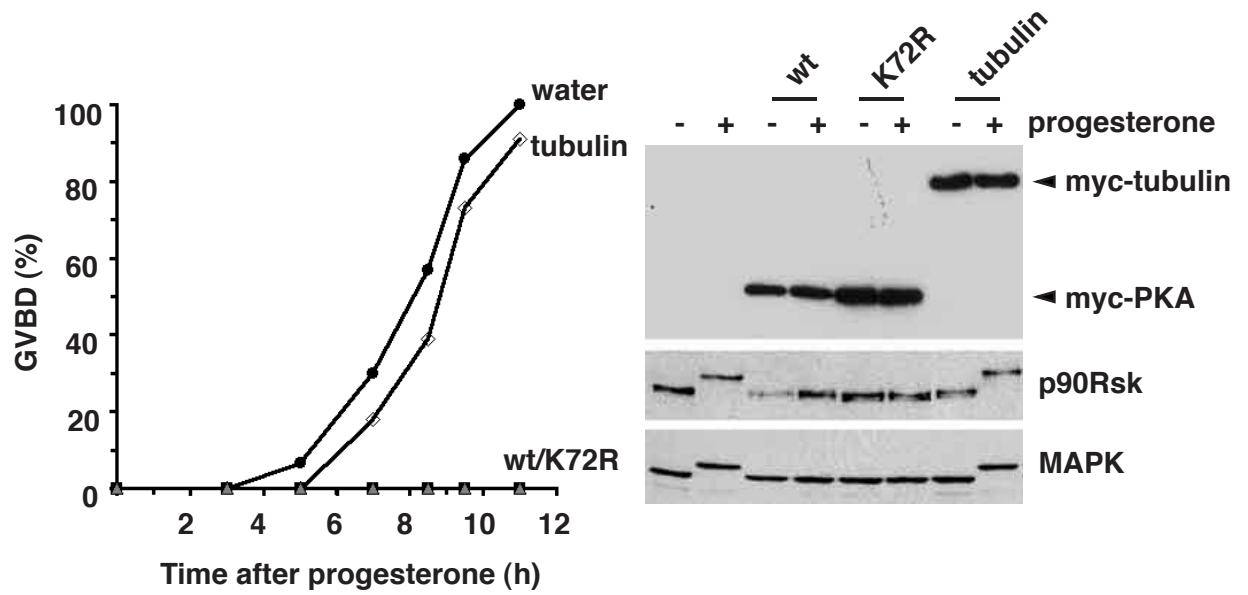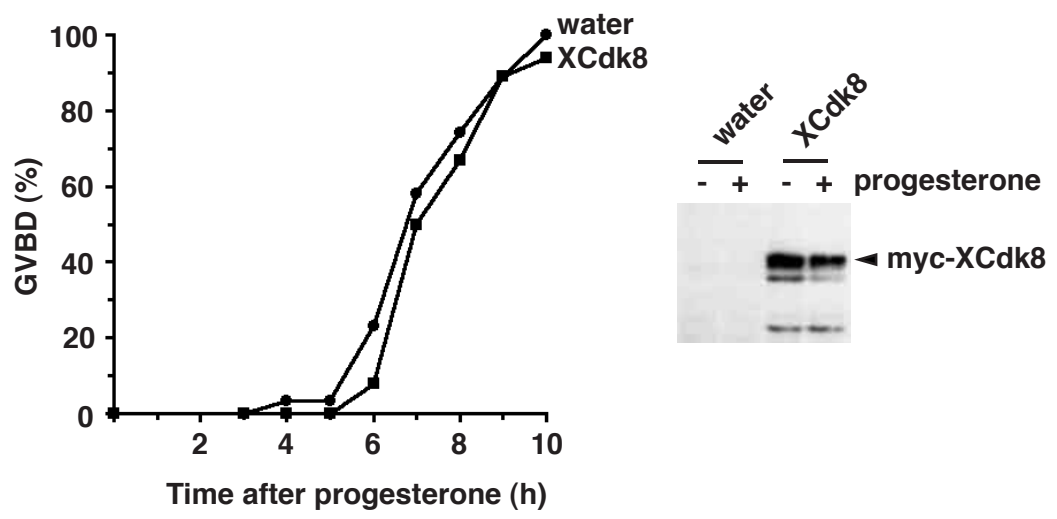

Supplement: pnas_022056399_7.pdf [file pnas_022056399_7.pdf]

**<sup>32</sup>P-histone H1**

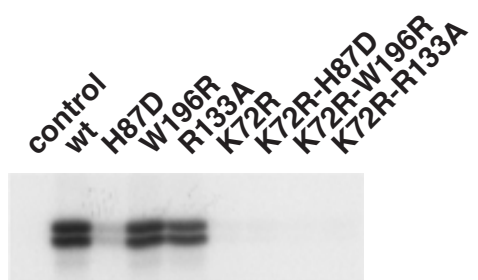

Supplement: pnas_022056399_8.pdf [file pnas_022056399_8.pdf]
